# Supplementary material for: Stable isotope labeling by essential nutrients in cell culture (SILEC) for accurate measurement of nicotinamide adenine dinucleotide metabolism
Source: Royal Society of Chemistry journal article supplement (doi:10.1039/c7an01378g), 2017-01-01
Supplement: c7an01378g1.pdf [file c7an01378g1.pdf]

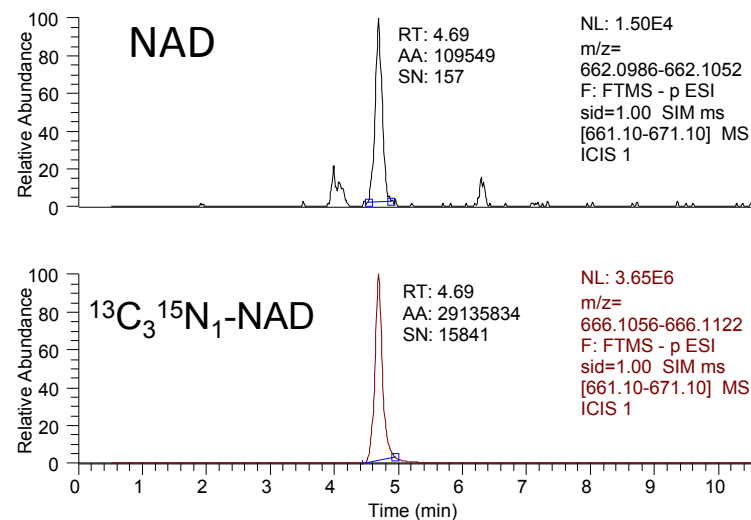

**Figure S1. Purity of NAD in internal standard extract alone.** Representative chromatogram with peak integration for LC-HRMS analysis of NAD labeling in internal standard extract. Labeling purity was calculated by the area under the curve (AA) as the percentage of  $\text{NAD}/(\text{NAD} + ^{13}\text{C}_3^{15}\text{N}_1\text{-NAD})$ . For this experiment this corresponded to  $109549/(109459+29135834)= 99.63\%$  labeling.
